# Supplementary material for: Impact of control interventions on malaria incidence in the general population of Mali
Source: Research Square preprint supplement (doi:10.21203/rs.3.rs-4934704/v1), 2024-09-17
Supplement: Supplementary file 1 [file 1889797e0607d62b8b9c7a87.docx]

**Table 1**: Data source and frequency.

| Variable | Source | Frequency |
| --- | --- | --- |
| Malaria data | DHIS2 | Monthly |
| Population data | GPHC | Yearly |
| Consultation data | DHIS2 | Monthly |
| Rainfall data | CHIRPS | Daily |
| Intervention data  Diagnosis | DHIS2 | Monthly |
| Treatment | DHIS2 | Monthly |
| SMC | Report | Yearly |
| iCCM | DHIS2 | Yearly |
| IPTp  LLIN - mass distribution | DHIS2  Report | Monthly Every 3 years |
| LLIN - routine distribution | DHIS2 | Monthly |

SMC: Seasonal malaria chemoprevention; IPTp: Intermittent preventive treatment in pregnancy;

LLIN: long-lasting insecticidal net; DHIS2: District Health Information Software version 2; GPHC: General Population and Housing Census; CHIRPS: Climate Hazards Group InfraRed Precipitation with Station data.
