# Supplementary material for: Impact of control interventions on malaria incidence in the general population of Mali
Source: Research Square preprint supplement (doi:10.21203/rs.3.rs-4934704/v1), 2024-09-17
Supplement: Supplementary file 2 [file cc3e2e92d690769be83fae1e.docx]

**Table 2**: Time spans of the 5 malaria epidemic years

| Malaria epidemic years | Time span |
| --- | --- |
| 2017-2018 | April 2017 to March 2018 |
| 2018-2019 | April 2018 to March 2019 |
| 2019-2020 | April 2019 to March 2020 |
| 2020-2021  2021-2022 | April 2020 to March 2021  April 2021 to March 2022 |

The time spans of the 5 malaria epidemic years are shown in Table**.**
